# Supplementary figures and images for: Molecular localization and characterization of multiple binding sites of organic anion transporting polypeptide 2B1 (OATP2B1) as the mechanism for substrate and modulator dependent drug–drug interaction
Source: Royal Society of Chemistry journal article supplement (doi:10.1039/c6md00235h), 2016-01-01

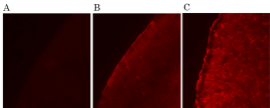

Supplement: c6md00235h2.pdf [file c6md00235h2.pdf]
